# Supplementary material
Source: PubMed Central journal article supplement (PMC3711132)
Supplement: NIHMS480102-supplement-Supporting_Info.pdf [file NIHMS480102-supplement-Supporting_Info.pdf]

## Supporting Information

### **Phytochemical Investigation of *Cycas circinalis* and *Cycas revoluta* Leaflets: Moderately Active Antibacterial Biflavonoids**

**Abeer Moawad<sup>1,2</sup>, Mona Hetta<sup>2</sup>, Jordan K. Zjawiony<sup>1</sup>, Melissa R. Jacob<sup>3</sup>, Mohamed Hifnawy<sup>4</sup>, Daneel Ferreira<sup>1</sup>**

#### **Affiliation**

<sup>1</sup> Department of Pharmacognosy and Research Institute of Pharmaceutical Sciences, School of Pharmacy, University of Mississippi, University, MS, USA

<sup>2</sup> Department of Pharmacognosy, School of Pharmacy, Beni Suef University, Beni Suef, Egypt

<sup>3</sup> National Center for Natural Products Research, School of Pharmacy, University of Mississippi, University, MS, USA

<sup>4</sup> Department of Pharmacognosy, School of Pharmacy, Cairo University, Cairo, Egypt

#### **Correspondence**

***Dr. Daneel Ferreira***

Department of Pharmacognosy

School of Pharmacy

University of Mississippi

University

MS 38677

USA

Tel.: +1/662/915/7026

Fax: +1/662/915/6975

[dferreir@olemiss.edu](mailto:dferreir@olemiss.edu)

Compound 2  
<sup>1</sup>H NMR

| Parameter                 | Value                                                                                |
|---------------------------|--------------------------------------------------------------------------------------|
| 1 Data File Name          | C:/ Documents and Settings/<br>Administrator/<br>Desktop/ NMR DATA/<br>DMTHA/ 1/ fid |
| 2 Title                   | DMTHA                                                                                |
| 3 Origin                  | Bruker BioSpin GmbH                                                                  |
| 4 Owner                   | moawad                                                                               |
| 5 Solvent                 | Acetone                                                                              |
| 6 Pulse Sequence          | zg30                                                                                 |
| 7 Acquisition Date        | 2009-01-27T12:51:45                                                                  |
| 8 Modification Date       |                                                                                      |
| 9 Temperature             | 298.2                                                                                |
| 10 Number of Scans        | 8                                                                                    |
| 11 Spectrometer Frequency | 400.15                                                                               |
| 12 Spectral Width         | 8223.7                                                                               |
| 13 Lowest Frequency       | -1640.8                                                                              |
| 14 Nucleus                | <sup>1</sup> H                                                                       |
| 15 Acquired Size          | 32768                                                                                |
| 16 Spectral Size          | 65536                                                                                |

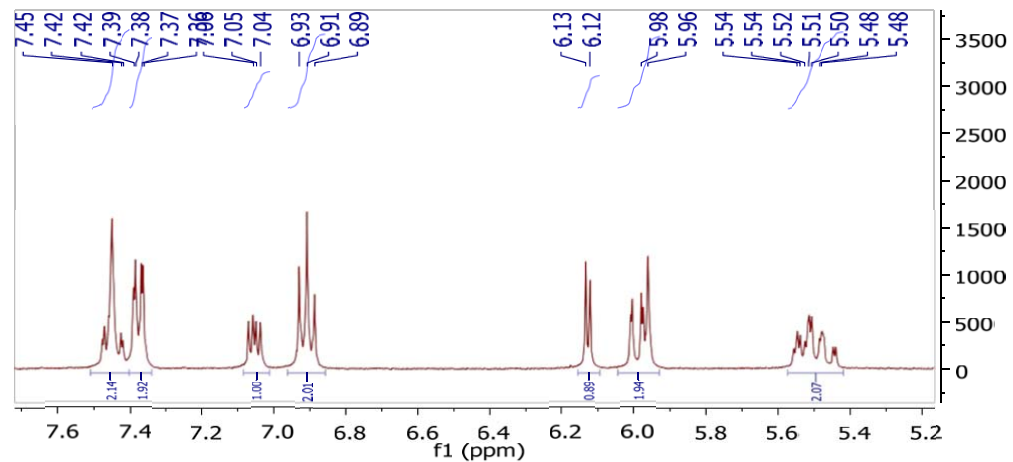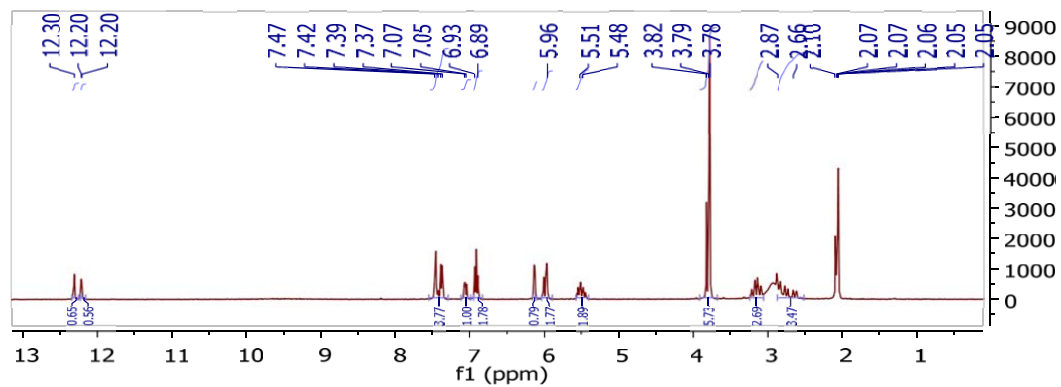

Fig. 1S <sup>1</sup>H NMR spectrum of compound 2.

**2**  
Compound  
<sup>13</sup>C NMR

| Parameter                 | Value                                       |
|---------------------------|---------------------------------------------|
| 1 Data File Name          | F:/ raw dataNMR/ DMTHA (FINAL 9 mg)/ 2/ fid |
| 2 Title                   | Bruker AV400 Carbon                         |
| 3 Origin                  | Bruker BioSpin GmbH                         |
| 4 Owner                   | moawad                                      |
| 5 Solvent                 | Acetone                                     |
| 6 Pulse Sequence          | zgpg30                                      |
| 7 Acquisition Date        | 2009-03-01T11:00:38                         |
| 8 Modification Date       |                                             |
| 9 Temperature             | 298.2                                       |
| 10 Number of Scans        | 3000                                        |
| 11 Spectrometer Frequency | 100.62                                      |
| 12 Spectral Width         | 24038.5                                     |
| 13 Lowest Frequency       | -1957.9                                     |
| 14 Nucleus                | <sup>13</sup> C                             |
| 15 Acquired Size          | 32768                                       |
| 16 Spectral Size          | 65536                                       |

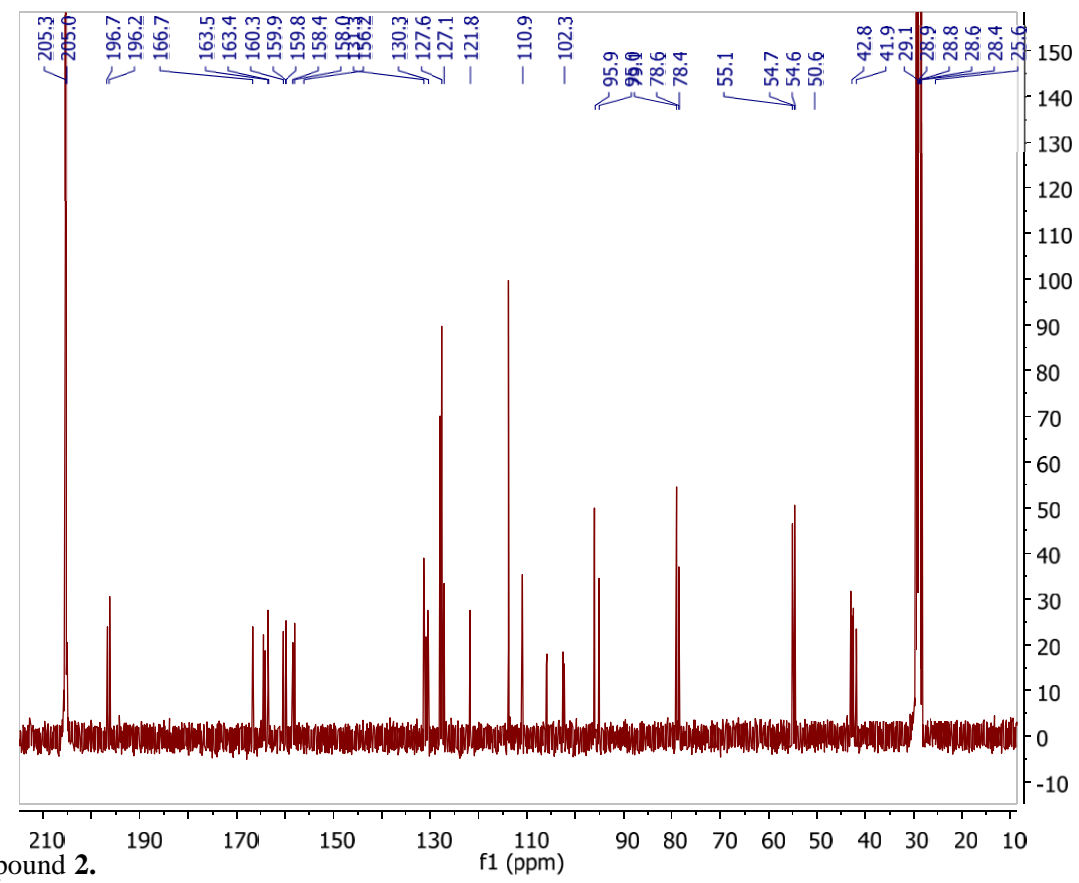

**Fig. 2S** <sup>13</sup>C NMR spectrum of compound 2.

Compound **6**  
<sup>1</sup>H NMR

| Parameter                 | Value                                                                                |
|---------------------------|--------------------------------------------------------------------------------------|
| 1 Data File Name          | C:/ Documents and Settings/ Administrator/ Desktop/ NMR DATA/ 1B1 mix (MTHA)/ 1/ fid |
| 2 Title                   | 1B1 mix (MTHA)                                                                       |
| 3 Origin                  | Bruker BioSpin GmbH                                                                  |
| 4 Owner                   | moawad                                                                               |
| 5 Solvent                 | Acetone                                                                              |
| 6 Pulse Sequence          | zg30                                                                                 |
| 7 Acquisition Date        | 2009-01-07T10:04:03                                                                  |
| 8 Modification Date       |                                                                                      |
| 9 Temperature             | 298.2                                                                                |
| 10 Number of Scans        | 24                                                                                   |
| 11 Spectrometer Frequency | 400.15                                                                               |
| 12 Spectral Width         | 8223.7                                                                               |
| 13 Lowest Frequency       | -1640.8                                                                              |
| 14 Nucleus                | <sup>1</sup> H                                                                       |
| 15 Acquired Size          | 32768                                                                                |
| 16 Spectral Size          | 65536                                                                                |

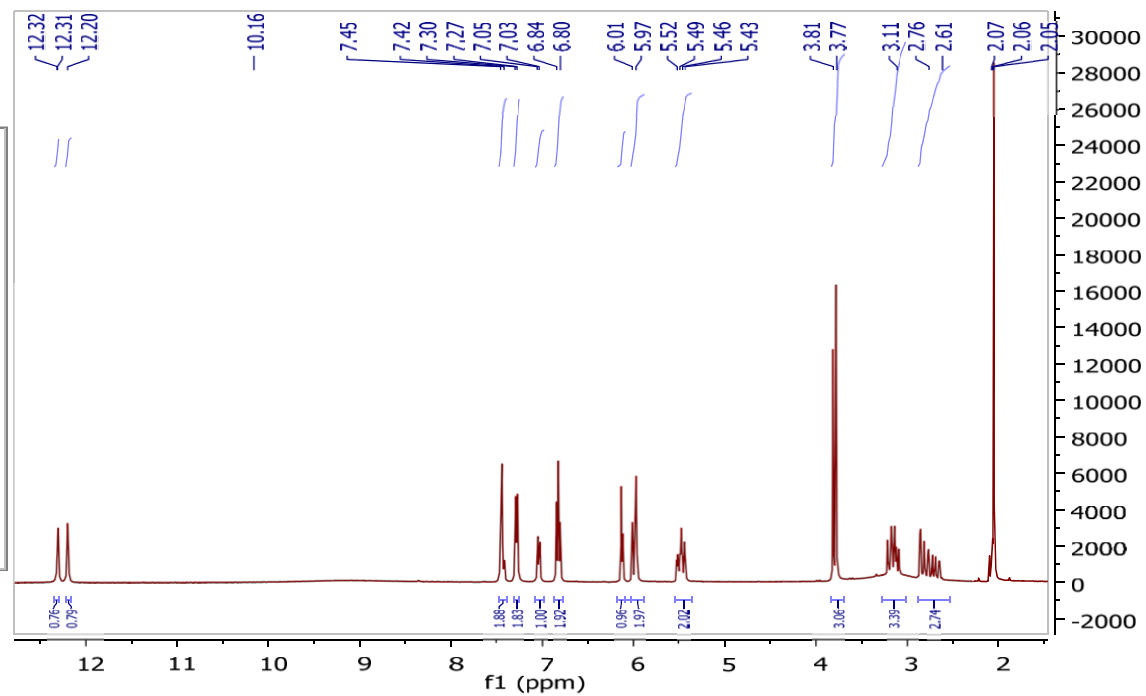

Fig. 3S <sup>1</sup>H NMR spectrum of compound **6**.

Compound **6**  
<sup>13</sup>C NMR

| Parameter                 | Value                                                                                            |
|---------------------------|--------------------------------------------------------------------------------------------------|
| 1 Data File Name          | C:/ Documents and Settings/ Administrator/ Desktop/ NMR DATA/ for the paper / MTHA FINAL/ 2/ fid |
| 2 Title                   | Bruker AV400 Carbon                                                                              |
| 3 Origin                  | Bruker BioSpin GmbH                                                                              |
| 4 Owner                   | moawad                                                                                           |
| 5 Solvent                 | Acetone                                                                                          |
| 6 Pulse Sequence          | zgpg30                                                                                           |
| 7 Acquisition Date        | 2009-02-21T03:26:08                                                                              |
| 8 Modification Date       |                                                                                                  |
| 9 Temperature             | 298.2                                                                                            |
| 10 Number of Scans        | 3000                                                                                             |
| 11 Spectrometer Frequency | 100.62                                                                                           |
| 12 Spectral Width         | 24038.5                                                                                          |
| 13 Lowest Frequency       | -1957.9                                                                                          |
| 14 Nucleus                | <sup>13</sup> C                                                                                  |
| 15 Acquired Size          | 32768                                                                                            |
| 16 Spectral Size          | 65536                                                                                            |

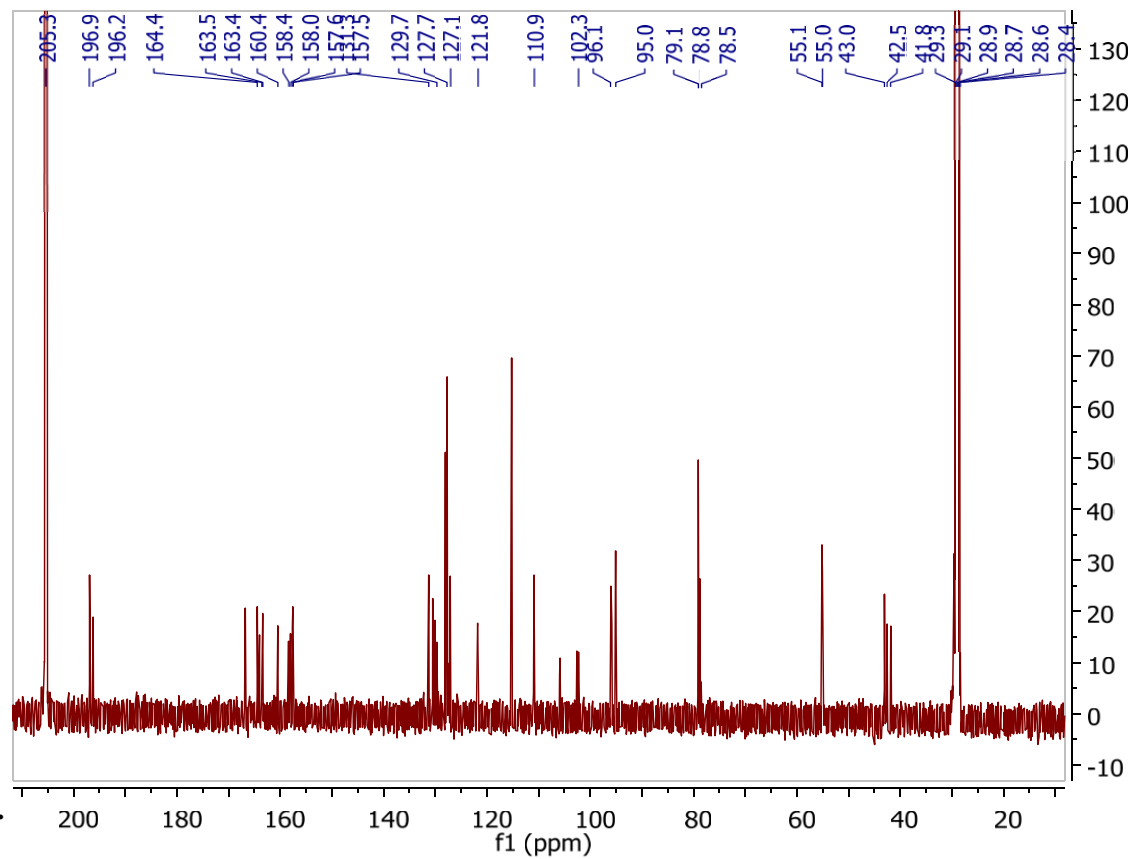

Fig. 4S <sup>13</sup>C NMR spectrum of compound 6.

Compound **7**  
<sup>1</sup>H NMR

| Parameter                 | Value                                                                                |
|---------------------------|--------------------------------------------------------------------------------------|
| 1 Data File Name          | C:/ Documents and Settings/ Administrator/ Desktop/ NMR DATA/ MDHA full data/ 1/ fid |
| 2 Title                   | MDHA full data                                                                       |
| 3 Origin                  | Bruker BioSpin GmbH                                                                  |
| 4 Owner                   | moawad                                                                               |
| 5 Solvent                 | Acetone                                                                              |
| 6 Pulse Sequence          | zg30                                                                                 |
| 7 Acquisition Date        | 2009-01-08T09:23:32                                                                  |
| 8 Modification Date       |                                                                                      |
| 9 Temperature             | 298.2                                                                                |
| 10 Number of Scans        | 8                                                                                    |
| 11 Spectrometer Frequency | 400.15                                                                               |
| 12 Spectral Width         | 8223.7                                                                               |
| 13 Lowest Frequency       | -1640.8                                                                              |
| 14 Nucleus                | 1H                                                                                   |
| 15 Acquired Size          | 32768                                                                                |
| 16 Spectral Size          | 65536                                                                                |

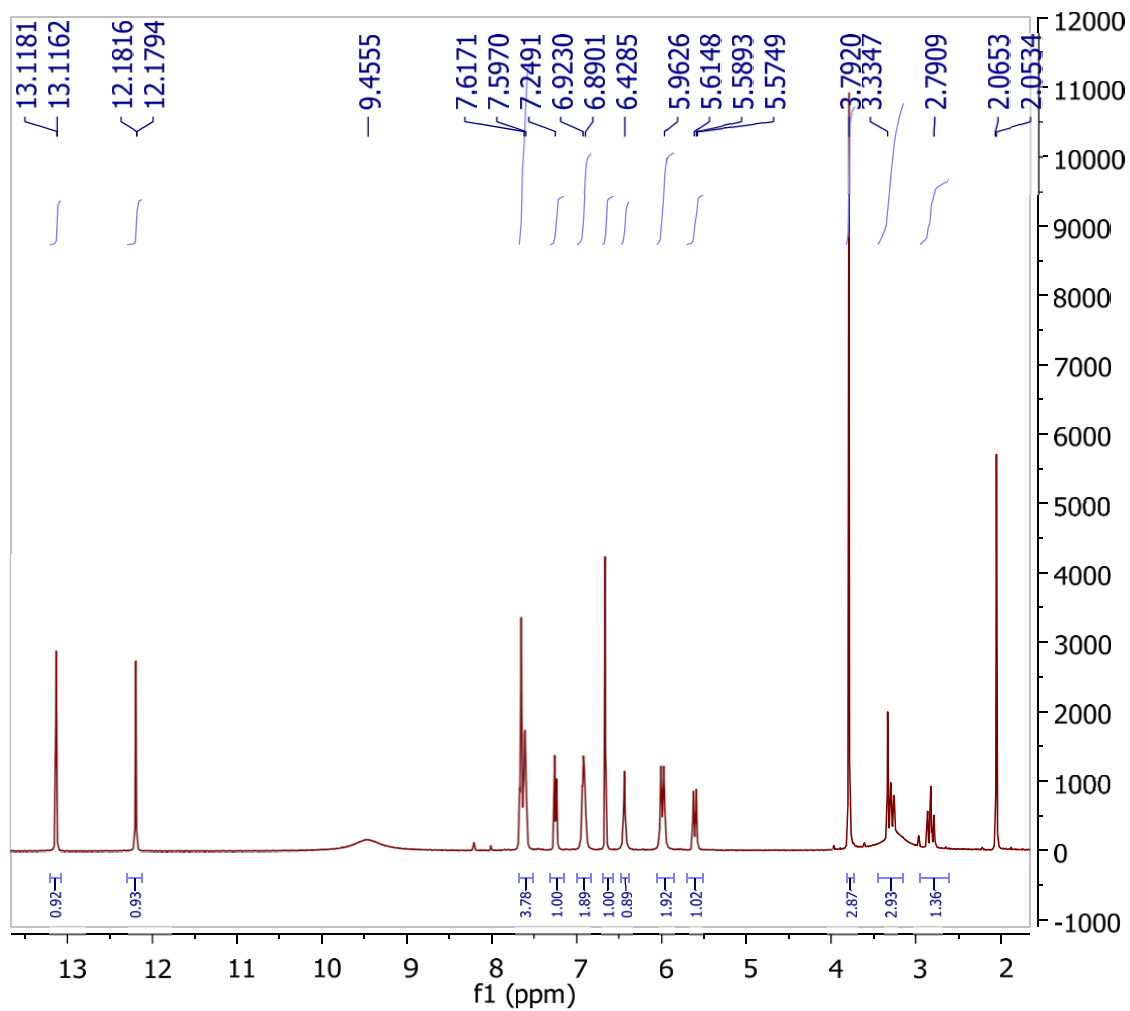

Fig. 5S <sup>1</sup>H NMR spectrum of compound 7.

Compound **7**  
<sup>13</sup>C NMR

| Parameter                 | Value                                   |
|---------------------------|-----------------------------------------|
| 1 Data File Name          | F:/ raw dataNMR/ MDHA full data/ 3/ fid |
| 2 Title                   | Bruker AV400 Carbon                     |
| 3 Origin                  | Bruker BioSpin GmbH                     |
| 4 Owner                   | moawad                                  |
| 5 Solvent                 | Acetone                                 |
| 6 Pulse Sequence          | zgpg30                                  |
| 7 Acquisition Date        | 2009-01-09T17:57:47                     |
| 8 Modification Date       |                                         |
| 9 Temperature             | 298.2                                   |
| 10 Number of Scans        | 753                                     |
| 11 Spectrometer Frequency | 100.62                                  |
| 12 Spectral Width         | 24038.5                                 |
| 13 Lowest Frequency       | -1957.9                                 |
| 14 Nucleus                | <sup>13</sup> C                         |
| 15 Acquired Size          | 32768                                   |
| 16 Spectral Size          | 65536                                   |

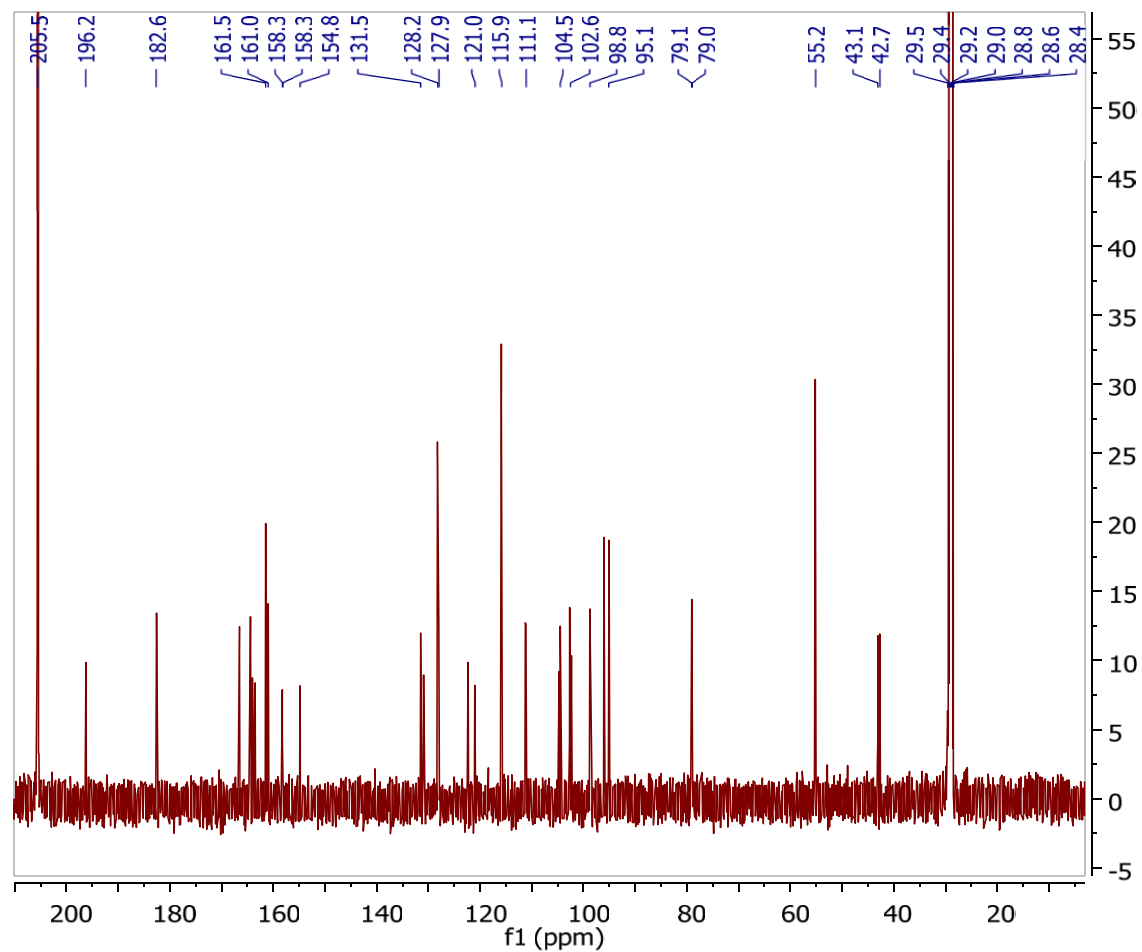

Fig. 6S <sup>13</sup>C NMR spectrum of compound 7.

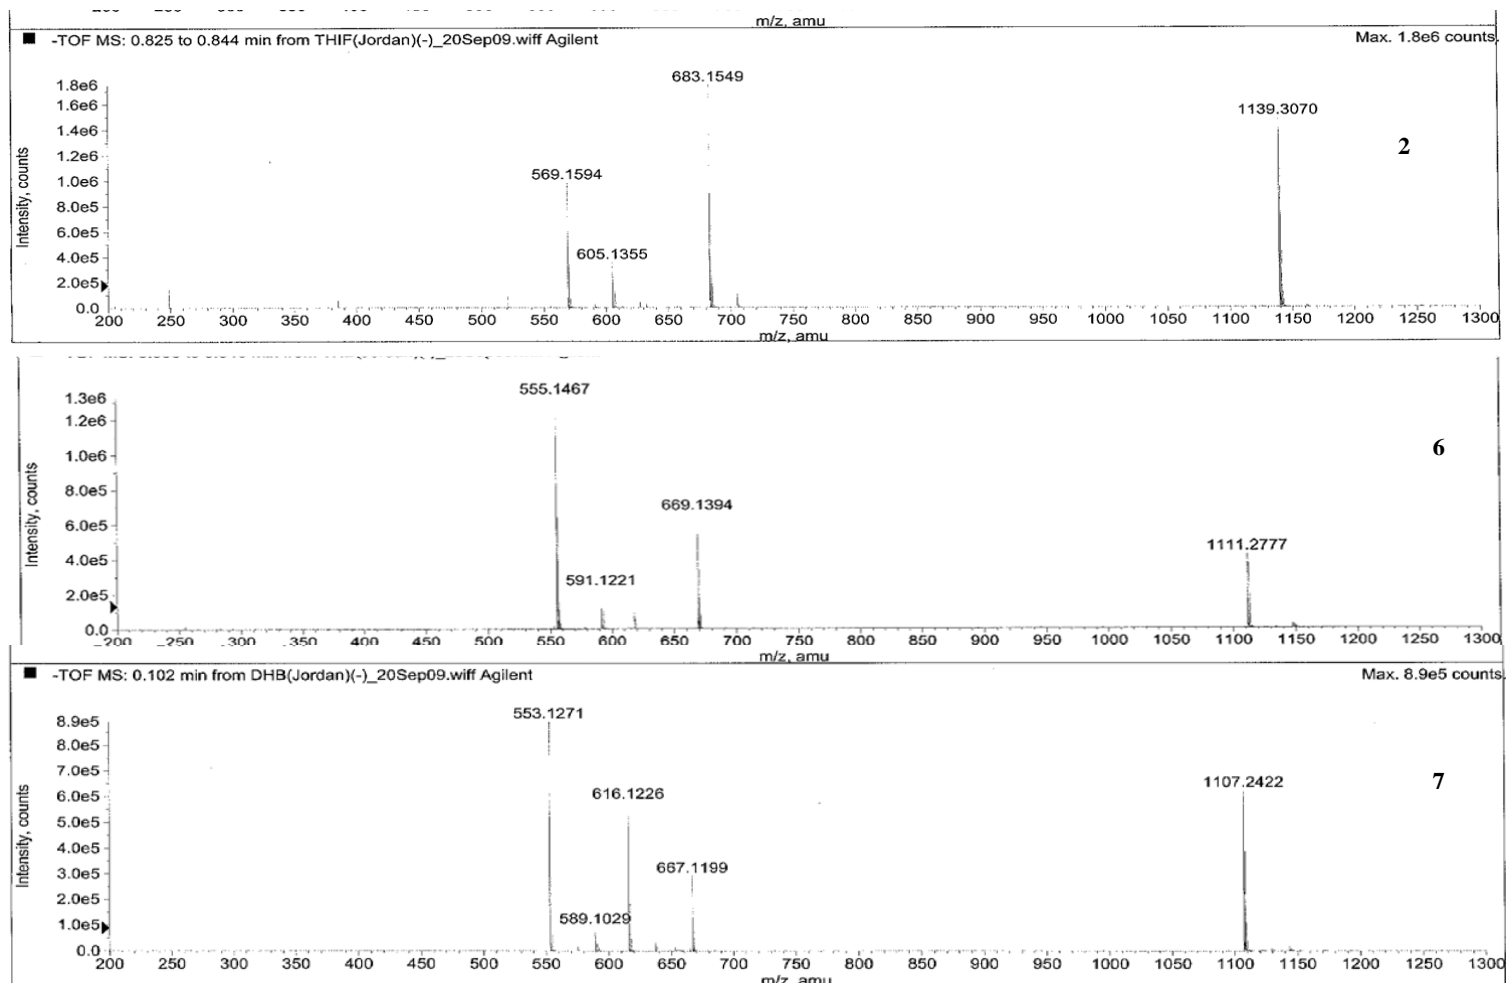

Fig 7S HR-MS spectra for compounds 2,6, and 7.
